# Supplementary material for: Antimicrobial Susceptibility Profiles of Pasteurella multocida Isolates from Clinical Cases of Waterfowl in Hungary between 2022 and 2023
Source: MDPI journal article supplement (doi:10.3390/vetsci11050194), 2024-04-28
Supplement: s1 [file s1]

Supplementary Table S1: Origin of *Pasteurella multocida* strains isolated from clinical cases by animal species, organs, and regional and local origins in Hungary.

| No. | Bacteria                     | ID     | Species | Organ       | Regio              | Settlement       |
|-----|------------------------------|--------|---------|-------------|--------------------|------------------|
| 1   | <i>Pasteurella multocida</i> | 10906  | goose   | liver       | Észak-Alföld       | Kunszentmárton   |
| 2   | <i>Pasteurella multocida</i> | 11298  | goose   | liver       | Dél-Alföld         | Kiskunfélegyháza |
| 3   | <i>Pasteurella multocida</i> | 11298  | goose   | lungs       | Dél-Alföld         | Kiskunfélegyháza |
| 4   | <i>Pasteurella multocida</i> | 11788  | goose   | liver       | Dél-Alföld         | Kondoros         |
| 5   | <i>Pasteurella multocida</i> | 14832  | goose   | liver       | Közép-Magyarország | Tatárszentgyörgy |
| 6   | <i>Pasteurella multocida</i> | 15704  | goose   | liver       | Észak-Magyarország | Cered            |
| 7   | <i>Pasteurella multocida</i> | 21958  | goose   | liver       | Dél-Alföld         | Szentes          |
| 8   | <i>Pasteurella multocida</i> | 21958  | goose   | lungs       | Dél-Alföld         | Szentes          |
| 9   | <i>Pasteurella multocida</i> | 22079  | duck    | liver       | Dél-Dunántúl       | Balatonszemes    |
| 10  | <i>Pasteurella multocida</i> | 22919  | goose   | liver       | Dél-Alföld         | Szentes          |
| 11  | <i>Pasteurella multocida</i> | 25054  | goose   | liver       | Dél-Alföld         | Szentes          |
| 12  | <i>Pasteurella multocida</i> | 37287  | goose   | liver       | Dél-Alföld         | Soltvadkert      |
| 13  | <i>Pasteurella multocida</i> | 41550  | goose   | liver       | Közép-Magyarország | Dömösd           |
| 14  | <i>Pasteurella multocida</i> | 52681  | goose   | liver       | Dél-Alföld         | Bócsa            |
| 15  | <i>Pasteurella multocida</i> | 52682  | goose   | liver       | Dél-Alföld         | Bócsa            |
| 16  | <i>Pasteurella multocida</i> | 57991  | goose   | liver       | Dél-Alföld         | Bócsa            |
| 17  | <i>Pasteurella multocida</i> | 58612  | goose   | liver       | Észak-Alföld       | Öcsöd            |
| 18  | <i>Pasteurella multocida</i> | 60458  | goose   | liver       | Észak-Alföld       | Öcsöd            |
| 19  | <i>Pasteurella multocida</i> | 60463  | goose   | liver       | Észak-Alföld       | Öcsöd            |
| 20  | <i>Pasteurella multocida</i> | 66107  | goose   | liver       | Észak-Alföld       | Öcsöd            |
| 21  | <i>Pasteurella multocida</i> | 71764  | goose   | bone marrow | Észak-Alföld       | Öcsöd            |
| 22  | <i>Pasteurella multocida</i> | 72106  | goose   | liver       | Észak-Alföld       | Öcsöd            |
| 23  | <i>Pasteurella multocida</i> | 81753  | goose   | liver       | Közép-Magyarország | Taksony          |
| 24  | <i>Pasteurella multocida</i> | 90742  | duck    | liver       | Dél-Alföld         | Kiskunmajsa      |
| 25  | <i>Pasteurella multocida</i> | 92197  | duck    | liver       | Dél-Alföld         | Forráskút        |
| 26  | <i>Pasteurella multocida</i> | 96174  | goose   | liver       | Közép-Magyarország | Tatárszentgyörgy |
| 27  | <i>Pasteurella multocida</i> | 106347 | goose   | liver       | Észak-Alföld       | Debrecen         |

Supplementary Table S2: The results of species identification using the MALDI-TOF device.

| No. | Matched Pattern                                                | log (score) (Conf.) | *NCBI Identifier |
|-----|----------------------------------------------------------------|---------------------|------------------|
| 1   | <i>Pasteurella multocida</i> ssp <i>multocida</i> CIP 56_3 CIP | 2.44 (+++)          | 747              |
| 2   | <i>Pasteurella multocida</i> A244_07 FLR                       | 2.27 (+++)          | 747              |
| 3   | <i>Pasteurella multocida</i> A244_07 FLR                       | 2.20 (+++)          | 747              |
| 4   | <i>Pasteurella multocida</i> A244_07 FLR                       | 2.27 (+++)          | 747              |
| 5   | <i>Pasteurella multocida</i> besSt7 THL                        | 2.21 (+++)          | 747              |
| 6   | <i>Pasteurella multocida</i> A244_07 FLR                       | 2.46 (+++)          | 747              |
| 7   | <i>Pasteurella multocida</i> A244_07 FLR                       | 2.26 (+++)          | 747              |
| 8   | <i>Pasteurella multocida</i> ssp <i>multocida</i> CIP 56_3 CIP | 2.33 (+++)          | 747              |
| 9   | <i>Pasteurella multocida</i> A244_07 FLR                       | 2.31 (+++)          | 747              |
| 10  | <i>Pasteurella multocida</i> A244_07 FLR                       | 2.31 (+++)          | 747              |
| 11  | <i>Pasteurella multocida</i> A244_07 FLR                       | 2.37 (+++)          | 747              |
| 12  | <i>Pasteurella multocida</i> A129_06 FLR                       | 2.29 (+++)          | 747              |
| 13  | <i>Pasteurella multocida</i> A244_07 FLR                       | 2.34 (+++)          | 747              |
| 14  | <i>Pasteurella multocida</i> A129_06 FLR                       | 2.21 (+++)          | 747              |
| 15  | <i>Pasteurella multocida</i> A244_07 FLR                       | 2.34 (+++)          | 747              |
| 16  | <i>Pasteurella multocida</i> ssp <i>multocida</i> CIP 56_3 CIP | 2.27 (+++)          | 747              |
| 17  | <i>Pasteurella multocida</i> A244_07 FLR                       | 2.38 (+++)          | 747              |
| 18  | <i>Pasteurella multocida</i> A244_07 FLR                       | 2.26 (+++)          | 747              |
| 19  | <i>Pasteurella multocida</i> ssp <i>multocida</i> CIP 56_3 CIP | 2.27 (+++)          | 747              |
| 20  | <i>Pasteurella multocida</i> ssp <i>multocida</i> CIP 56_3 CIP | 2.24 (+++)          | 747              |
| 21  | <i>Pasteurella multocida</i> ssp <i>multocida</i> CIP 56_3 CIP | 2.28 (+++)          | 747              |
| 22  | <i>Pasteurella multocida</i> ssp <i>multocida</i> CIP 56_3 CIP | 2.37 (+++)          | 747              |
| 23  | <i>Pasteurella multocida</i> ssp <i>multocida</i> CIP 56_3 CIP | 2.30 (+++)          | 747              |
| 24  | <i>Pasteurella multocida</i> A244_07 FLR                       | 2.19 (+++)          | 747              |
| 25  | <i>Pasteurella multocida</i> ssp <i>multocida</i> CIP 56_3 CIP | 2.27 (+++)          | 747              |
| 26  | <i>Pasteurella multocida</i> A244_07 FLR                       | 2.24 (+++)          | 747              |
| 27  | <i>Pasteurella multocida</i> A244_07 FLR                       | 2.34 (+++)          | 747              |

+++ High Confidence Identification (2.00 – 3.00 range)

\*NCBI: National Center for Biotechnology Information

Supplementary Table S3: MIC values per strain of active substances with CLSI-derived breakpoints for *Pasteurella multocida*.

| No. | PEN         | AMC   | CTO   | SPE | FLO  | CLO  | TIM | ENR   |
|-----|-------------|-------|-------|-----|------|------|-----|-------|
|     | MIC (µg/mL) |       |       |     |      |      |     |       |
| 1   | 0.06        | 0.125 | 0.015 | 8   | 0.25 | 0.5  | 4   | 1     |
| 2   | 0.06        | 0.125 | 0.015 | 8   | 0.25 | 0.5  | 8   | 1     |
| 3   | 0.125       | 0.125 | 0.015 | 4   | 0.25 | 0.5  | 4   | 0.5   |
| 4   | 0.06        | 0.125 | 0.015 | 8   | 0.25 | 0.5  | 2   | 0.015 |
| 5   | 0.06        | 0.125 | 0.015 | 8   | 0.25 | 0.5  | 4   | 0.015 |
| 6   | 0.06        | 0.125 | 0.06  | 8   | 0.25 | 0.5  | 4   | 0.007 |
| 7   | 0.125       | 0.125 | 0.015 | 4   | 0.25 | 0.5  | 4   | 0.007 |
| 8   | 0.06        | 0.125 | 0.015 | 8   | 0.25 | 0.5  | 4   | 0.007 |
| 9   | 0.06        | 0.125 | 0.015 | 8   | 0.25 | 0.5  | 8   | 0.015 |
| 10  | 0.06        | 0.125 | 0.015 | 8   | 0.25 | 0.5  | 16  | 0.015 |
| 11  | 0.06        | 0.125 | 0.015 | 8   | 0.25 | 0.5  | 8   | 0.007 |
| 12  | 0.06        | 0.125 | 0.015 | 8   | 0.25 | 0.5  | 4   | 0.5   |
| 13  | 0.06        | 0.125 | 0.06  | 8   | 0.25 | 0.25 | 4   | 0.015 |
| 14  | 0.125       | 0.125 | 0.015 | 8   | 0.25 | 0.5  | 8   | 1     |
| 15  | 0.06        | 0.125 | 0.015 | 8   | 0.25 | 0.5  | 4   | 1     |
| 16  | 0.06        | 0.06  | 0.015 | 8   | 0.25 | 0.5  | 8   | 0.007 |
| 17  | 0.06        | 0.125 | 0.015 | 8   | 0.25 | 0.5  | 16  | 0.007 |
| 18  | 0.06        | 0.125 | 0.015 | 8   | 0.25 | 0.5  | 8   | 0.5   |
| 19  | 0.06        | 0.06  | 0.015 | 8   | 0.25 | 0.5  | 8   | 0.5   |
| 20  | 0.06        | 0.125 | 0.015 | 8   | 0.25 | 0.5  | 4   | 0.5   |
| 21  | 0.06        | 0.125 | 0.015 | 8   | 0.25 | 0.5  | 4   | 0.5   |
| 22  | 0.06        | 0.125 | 0.015 | 8   | 0.25 | 0.5  | 8   | 1     |
| 23  | 0.06        | 0.125 | 0.015 | 8   | 0.25 | 0.5  | 4   | 0.007 |
| 24  | 0.06        | 0.125 | 0.015 | 8   | 0.25 | 0.5  | 8   | 0.015 |
| 25  | 0.06        | 0.125 | 0.015 | 8   | 0.25 | 0.5  | 8   | 1     |
| 26  | 0.06        | 0.125 | 0.015 | 16  | 0.25 | 0.5  | 4   | 0.015 |
| 27  | 0.06        | 0.125 | 0.015 | 8   | 0.25 | 0.5  | 4   | 0.007 |

PEN - penicillin; AMC - amoxicillin-clavulanic acid; CTO - ceftiofur; SPE - spectinomycin; FLO - florfenicol; CLO - chloramphenicol; TIM - tilmicosin; ENR – enrofloxacin

Supplementary Table S4: MIC values for active substances without clinical CLSI breakpoints for *Pasteurella multocida* strains and their MIC<sub>50</sub> and MIC<sub>90</sub> values.

| No.               | TIA         | PSA   | CXM   | IMI   | TIL | CTR   | AMX   | LIN | COL  | DOX   | MAR   | CLX | GEN | CLI | LEV   | CFQ  | GAT   | LSP |
|-------------------|-------------|-------|-------|-------|-----|-------|-------|-----|------|-------|-------|-----|-----|-----|-------|------|-------|-----|
|                   | MIC (µg/mL) |       |       |       |     |       |       |     |      |       |       |     |     |     |       |      |       |     |
| 1                 | 16          | 0.5   | 0.015 | 0.25  | 32  | 0.015 | 0.125 | 32  | 2    | 0.015 | 2     | 4   | 2   | 64  | 0.5   | 0.03 | 0.5   | 16  |
| 2                 | 32          | 0.5   | 0.015 | 0.25  | 32  | 0.015 | 0.125 | 32  | 16   | 0.015 | 2     | 2   | 2   | 64  | 0.5   | 0.03 | 0.5   | 32  |
| 3                 | 16          | 1     | 0.015 | 0.25  | 32  | 0.015 | 0.125 | 32  | 2    | 0.03  | 1     | 4   | 2   | 64  | 0.25  | 0.03 | 0.25  | 32  |
| 4                 | 32          | 32    | 0.015 | 0.25  | 32  | 0.015 | 0.125 | 32  | 0.5  | 0.06  | 0.03  | 4   | 2   | 128 | 0.007 | 0.03 | 0.03  | 32  |
| 5                 | 8           | 8     | 0.015 | 0.125 | 16  | 0.015 | 0.125 | 32  | 0.25 | 0.06  | 0.06  | 2   | 2   | 32  | 0.015 | 0.03 | 0.015 | 32  |
| 6                 | 8           | 8     | 0.015 | 0.5   | 32  | 0.03  | 0.125 | 32  | 4    | 0.06  | 0.03  | 2   | 2   | 64  | 0.007 | 0.03 | 0.015 | 32  |
| 7                 | 16          | 0.125 | 0.015 | 0.25  | 32  | 0.015 | 0.125 | 32  | 2    | 0.015 | 0.015 | 4   | 2   | 64  | 0.5   | 0.03 | 0.25  | 32  |
| 8                 | 16          | 4     | 0.015 | 0.06  | 32  | 0.007 | 0.125 | 16  | 4    | 0.015 | 0.015 | 2   | 2   | 32  | 0.007 | 0.03 | 0.06  | 32  |
| 9                 | 32          | 32    | 0.015 | 0.25  | 32  | 0.015 | 0.125 | 32  | 4    | 2     | 0.06  | 4   | 2   | 64  | 0.015 | 0.03 | 0.015 | 32  |
| 10                | 32          | 8     | 0.015 | 0.125 | 32  | 0.015 | 0.125 | 32  | 2    | 0.125 | 0.015 | 4   | 2   | 128 | 0.007 | 0.03 | 0.015 | 32  |
| 11                | 128         | 32    | 0.015 | 0.25  | 32  | 0.015 | 0.125 | 32  | 1    | 16    | 0.03  | 16  | 2   | 128 | 0.015 | 0.03 | 0.015 | 32  |
| 12                | 16          | 0.06  | 0.015 | 0.25  | 32  | 0.015 | 0.125 | 32  | 0.5  | 0.03  | 1     | 2   | 2   | 32  | 0.5   | 0.03 | 0.25  | 32  |
| 13                | 16          | 1     | 0.015 | 0.25  | 16  | 0.015 | 0.125 | 32  | 0.5  | 0.015 | 0.125 | 4   | 2   | 32  | 0.03  | 0.03 | 0.03  | 32  |
| 14                | 32          | 1     | 0.015 | 0.25  | 32  | 0.015 | 0.125 | 32  | 1    | 0.06  | 2     | 2   | 2   | 64  | 0.5   | 0.03 | 0.25  | 32  |
| 15                | 16          | 8     | 0.015 | 0.25  | 32  | 0.015 | 0.125 | 32  | 2    | 0.03  | 2     | 2   | 2   | 64  | 0.5   | 0.03 | 0.5   | 32  |
| 16                | 64          | 1     | 0.015 | 0.06  | 32  | 0.015 | 0.125 | 32  | 2    | 16    | 0.03  | 4   | 4   | 128 | 0.015 | 0.03 | 0.015 | 32  |
| 17                | 64          | 1     | 0.015 | 0.06  | 32  | 0.015 | 0.125 | 32  | 1    | 0.06  | 0.06  | 4   | 2   | 128 | 0.015 | 0.03 | 0.015 | 32  |
| 18                | 16          | 1     | 0.015 | 0.125 | 32  | 0.015 | 0.125 | 32  | 1    | 0.015 | 1     | 2   | 2   | 64  | 0.5   | 0.03 | 0.25  | 32  |
| 19                | 16          | 0.5   | 0.015 | 0.125 | 32  | 0.015 | 0.125 | 32  | 1    | 0.03  | 2     | 2   | 2   | 32  | 0.5   | 0.03 | 0.25  | 32  |
| 20                | 16          | 0.5   | 0.015 | 0.125 | 32  | 0.015 | 0.125 | 32  | 1    | 0.015 | 2     | 2   | 2   | 64  | 0.5   | 0.03 | 0.25  | 32  |
| 21                | 16          | 1     | 0.015 | 0.25  | 32  | 0.015 | 0.125 | 32  | 4    | 0.015 | 1     | 2   | 2   | 64  | 0.5   | 0.03 | 0.25  | 32  |
| 22                | 16          | 1     | 0.015 | 0.25  | 32  | 0.015 | 0.125 | 32  | 4    | 0.015 | 1     | 2   | 2   | 64  | 0.25  | 0.03 | 0.25  | 32  |
| 23                | 16          | 0.125 | 0.015 | 0.125 | 32  | 0.015 | 0.125 | 32  | 2    | 0.03  | 0.03  | 2   | 2   | 64  | 0.007 | 0.03 | 0.007 | 32  |
| 24                | 16          | 8     | 0.015 | 0.25  | 16  | 0.015 | 0.125 | 32  | 1    | 0.015 | 0.06  | 2   | 2   | 32  | 0.015 | 0.03 | 0.25  | 32  |
| 25                | 16          | 1     | 0.015 | 0.25  | 32  | 0.015 | 0.125 | 32  | 8    | 0.03  | 1     | 2   | 2   | 16  | 0.5   | 0.03 | 0.5   | 32  |
| 26                | 8           | 0.5   | 0.015 | 0.25  | 32  | 0.015 | 0.125 | 32  | 0.25 | 0.03  | 0.03  | 2   | 2   | 64  | 0.015 | 0.03 | 0.015 | 16  |
| 27                | 16          | 1     | 0.015 | 0.125 | 32  | 0.015 | 0.125 | 32  | 4    | 0.03  | 0.03  | 2   | 4   | 64  | 0.015 | 0.03 | 0.007 | 32  |
| MIC <sub>50</sub> | 16          | 1     | 0.015 | 0.25  | 32  | 0.015 | 0.125 | 32  | 2    | 0.03  | 0.06  | 2   | 2   | 64  | 0.015 | 0.03 | 0.06  | 32  |
| MIC <sub>90</sub> | 32          | 8     | 0.015 | 0.25  | 32  | 0.015 | 0.125 | 32  | 4    | 0.125 | 2     | 4   | 2   | 128 | 0.5   | 0.03 | 0.5   | 32  |

TIA - tiamulin; PSA - potent sulphonamide (trimethoprim - sulphamethoxazole, ratio 1:19); CXM - cefotaxime; IMI - imipenem; TIL - tilozin; CTR - ceftriaxone; AMX - amoxicillin; LIN - lincomycin; COL - colistin; DOX - doxycycline; MAR - marbofloxacin; CLX - cefalexin; GEN - gentamicin; CLI - clindamycin; LEV - levofloxacin; CFQ - cefquinome; GAT - gatifloxacin; LSP – lincomycin - spectinomycin (ratio 2:1)
